# Supplementary material for: miR-214-Enriched Extracellular Vesicles Released by Acid-Adapted Melanoma Cells Promote Inflammatory Macrophage-Dependent Tumor Trans-Endothelial Migration
Source: MDPI journal article supplement (doi:10.3390/cancers14205090), 2022-10-18
Supplement: s1 [file s1]

## Supplementary Materials

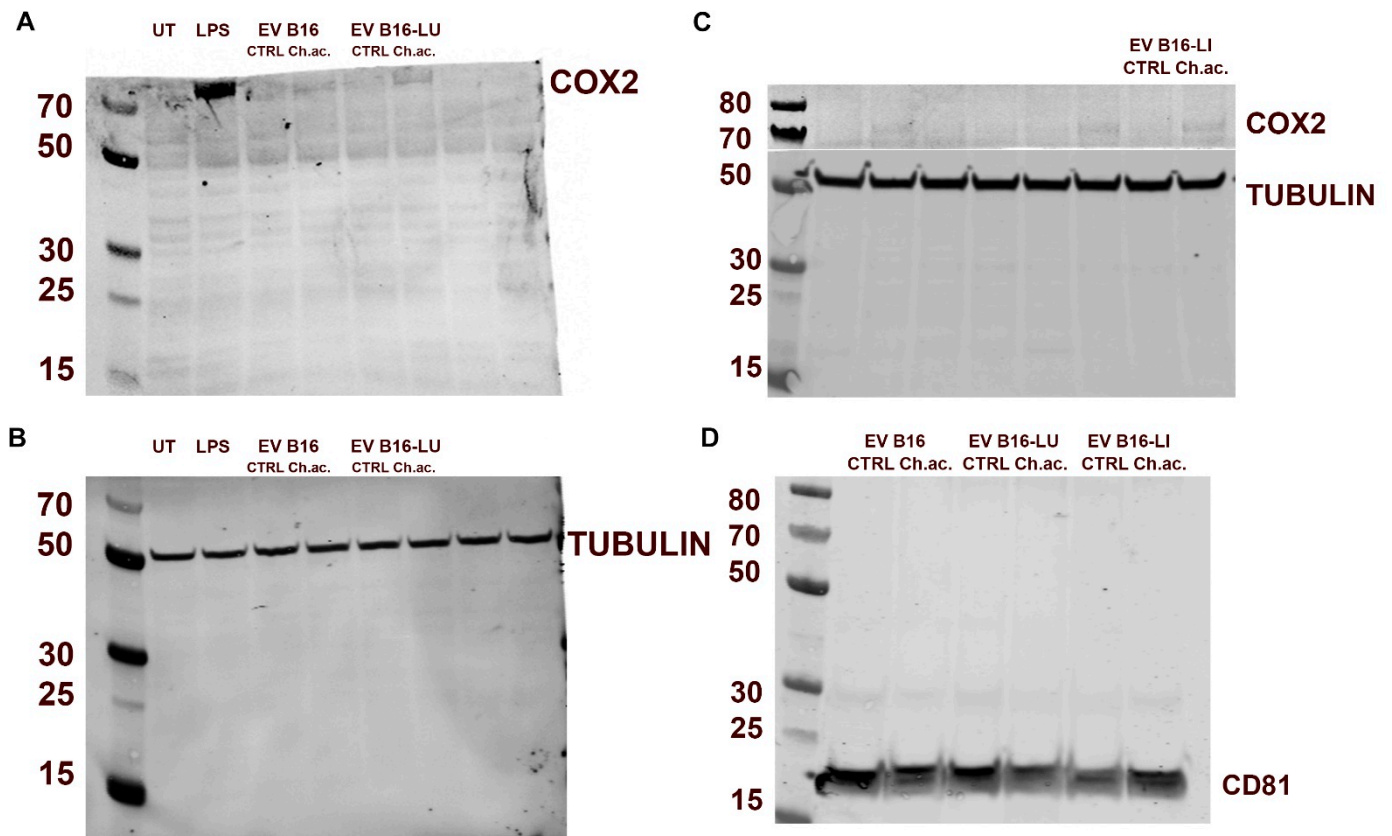

**Figure S1.** Western blot whole membranes. Images of whole western blot membranes of COX-2 (A) and relative tubulin (B) expression in RAW 264.7 macrophages treated with LPS or EV derived from control and acid B16 and B16-LU melanoma cells. (C) Western blot membrane of COX-2 and tubulin expression in RAW 264.7 macrophages treated with EV derived from control and acid-adapted B16-LI melanoma cells. (D) Western blot membrane of CD81 in EV derived from control and acid-adapted B16, B16-LU and B16-LI melanoma cells.

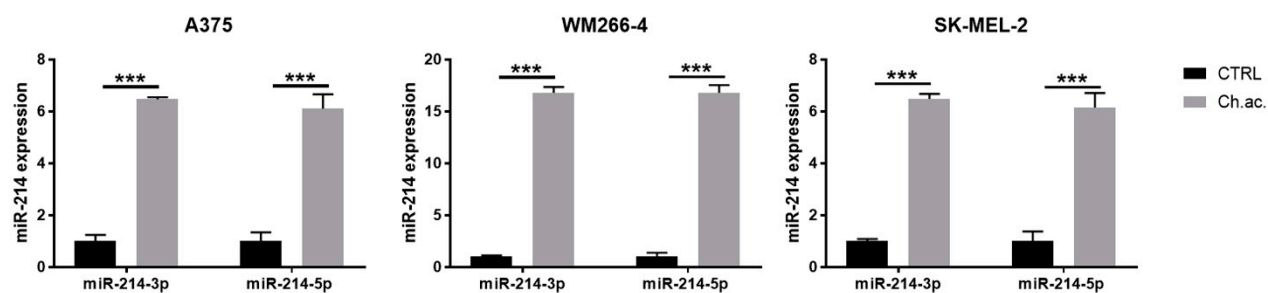

**Figure S2.** miR-214 in EVs released by human melanoma cells. Real-time qPCR analysis of miR-214-3p/5p levels carried in A375, WM266-4 and Sk-Mel-2 human melanoma cells grown under standard pH conditions (CTRL) or extracellular acidosis (Ch.ac.) (Two-way ANOVA).

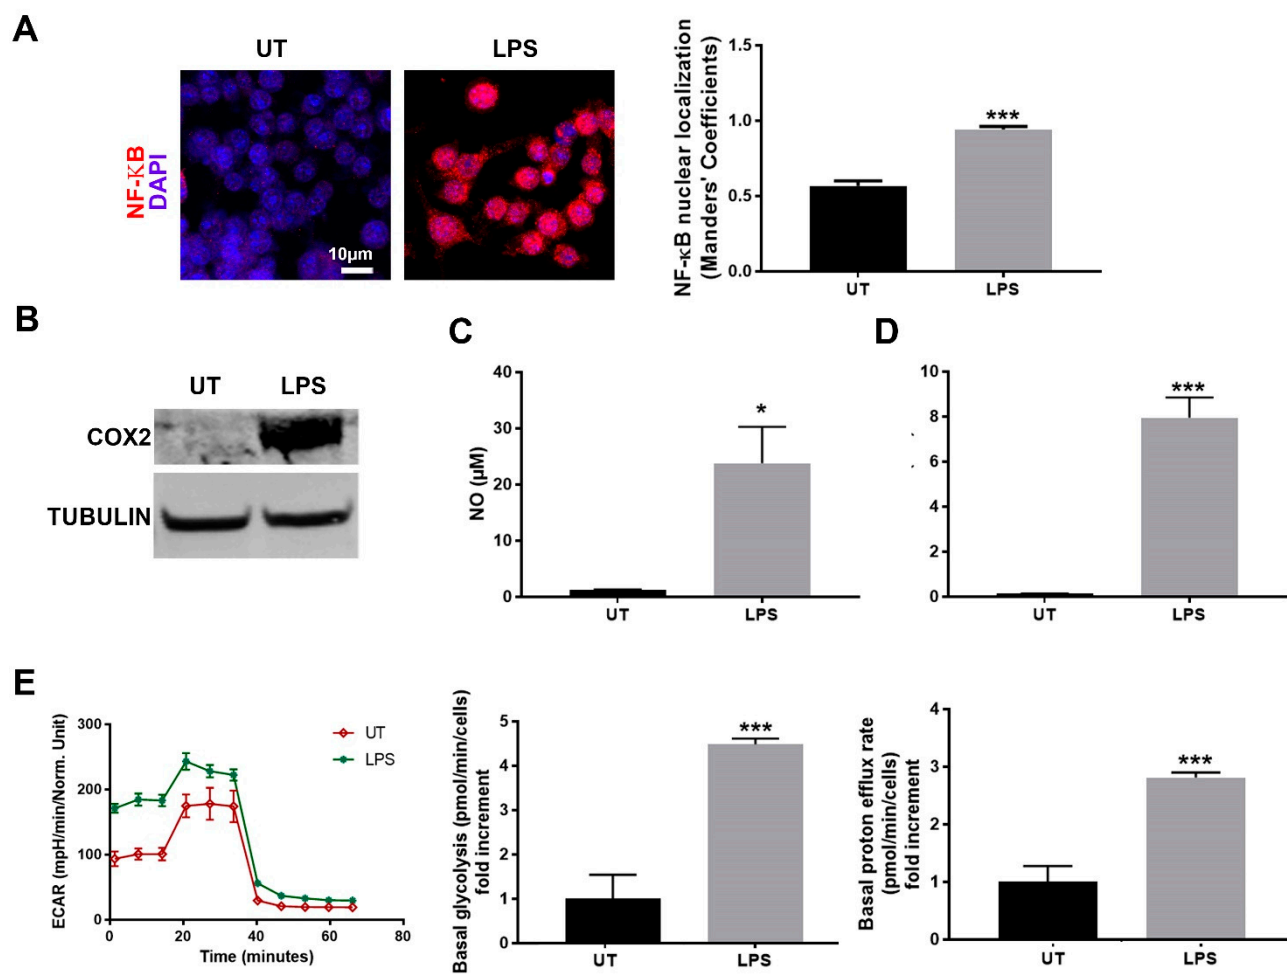

**Figure S3.** LPS-induced macrophage activation. (A) Immunofluorescence analysis of NF-κB nuclear localization in RAW 264.7 macrophages following LPS treatment (Scale bar = 10 μm; t-test). (B) Western blot analysis of COX-2 expression in RAW 264.7 treated with LPS. Tubulin served as housekeeper. (C) NO production by RAW 264.7 macrophages treated with LPS (t-test). (D) Lactate measure in conditioned media of RAW 264.7 treated with LPS (t-test) (E) Glycolytic Rate Assay at the Seahorse XFe96 analyzer, with representative ECAR plots (left), basal glycolysis (middle) and proton efflux rate (right) (t-test).
